# Supplementary material for: Inhibition of the p53/hDM2 protein-protein interaction by cyclometallated iridium(III) compounds
Source: PubMed Central journal article supplement (PMC4924691; doi:10.18632/oncotarget.7369), 2016-02-13
Supplement: oncotarget-07-13965-s001.pdf [file oncotarget-07-13965-s001.pdf]

## Inhibition of the p53/hDM2 protein-protein interaction by cyclometallated iridium(III) compounds

### Supplementary Materials

#### Synthesis of cyclometallated iridium (III) compounds

##### Preparation of the C<sup>^</sup>N ligand of 1 and 2

A solution of 1-bromo-4-ethylbenzene (0.37 g, 2.0 mmol) in 10 mL toluene was added bis(pinacolato) diboron (0.61 g, 2.4 mmol) and sodium acetate (0.25 g, 3.0 mmol), followed by the addition of catalytic amounts of Pd(dppf)Cl<sub>2</sub> under nitrogen atmosphere. The resulting mixture was allowed to heat 100°C for 5 hours. The reaction was monitored by Thin Layer Chromatography (TLC) (PE : EA = 8:1). Subsequently the reaction mixture was cooled to room temperature, diluted with EtOAc (40 mL), and filtered to remove the solid. The filtrate was washed with H<sub>2</sub>O (2 × 15 mL) and brine (2 × 15 mL). The organic layer was dried by anhydrous Na<sub>2</sub>SO<sub>4</sub>, and the solvent was removed in vacuum to get the crude product which was purified by silica gel column (PE : EA = 20:1~8:1) to yield 8 (0.42 g, yield: 86.2%) as a colorless oil. <sup>1</sup>H NMR (400 MHz, CDCl<sub>3</sub>) δ 7.75 (d, *J* = 8.0 Hz, 2H), 7.22 (d, *J* = 8.0 Hz, 2H), 2.67 (q, *J* = 7.6 Hz, 2H), 1.35 (s, 12 H), 1.24 (t, *J* = 8.0 Hz, 3H); <sup>13</sup>C NMR (100 MHz, CDCl<sub>3</sub>) δ 147.8, 134.9, 127.4, 83.6, 29.1, 24.9, 15.5.

A solution of 8 (0.40 g, 1.7 mmol) in 15 mL ethanol was added 2-bromopyridine (0.27 g, 1.7 mmol) and potassium carbonate (0.36 g, 2.6 mmol), followed by the addition of catalytic amounts of Pd(PPh<sub>3</sub>)<sub>4</sub> under nitrogen atmosphere. The resulting mixture was allowed to heat to reflux for overnight. The reaction was monitored by TLC (PE : EA = 5:1). After the reaction, the mixture was cooled to room temperature, diluted with EtOAc (50 mL), and filtered to remove the solid. The filtrate was washed with H<sub>2</sub>O (2 × 15 mL) and brine (2 × 15 mL). The organic layer was dried by anhydrous Na<sub>2</sub>SO<sub>4</sub>, and the solvent was removed in vacuum to get the crude product which was purified by silica gel column (PE : EA = 10:1~5:1) to yield 9 (0.29 g, yield: 93.2%) as a colorless oil. <sup>1</sup>H NMR (400 MHz, CDCl<sub>3</sub>) δ 8.67–8.66 (m, 1H), 7.91 (d, *J* = 6.4 Hz, 2H), 7.75–7.69 (m, 2H), 7.31 (d, *J* = 8.0 Hz, 2H), 7.21–7.18 (m, 1H), 2.70 (q, *J* = 7.6 Hz, 2H), 1.28 (t, *J* = 7.6 Hz, 3H); <sup>13</sup>C NMR (100 MHz, CDCl<sub>3</sub>) δ 157.5, 149.6, 145.3, 136.9, 136.7, 128.3, 126.9, 121.8, 120.3, 28.9, 15.5. HRMS: Calcd. for C<sub>13</sub>H<sub>13</sub>N[M+H]<sup>+</sup>: 184.1126 Found: 184.1129.

##### Preparation of the N<sup>^</sup>N ligands of compounds 5 and 6

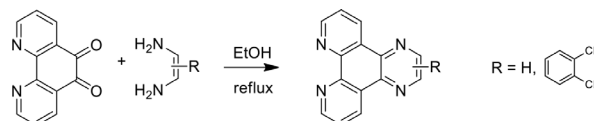

A mixture of 1, 10-phenanthroline-5, 6-dione (5.0 mmol) and diamine (6.0 mmol, 1.2 eq.) in ethanol were heated to reflux for overnight. After the reaction mixture was slowly cooled down to room temperature, the solid that precipitated from the solution were filtered off, washed with cold ethanol, and suction dried to obtain the desired products in pure form with yields of 86 and 92% directly used in next step.

##### Preparation of the dimer compounds [(C<sup>^</sup>N)<sub>2</sub>Ir(μ-Cl)]<sub>2</sub>

A mixture of iridium(III) chloride (150 mg, 0.43 mmol) and corresponding C<sup>^</sup>N ligands (0.95 mmol, 2.2 eq.) in methoxyethanol: deionized H<sub>2</sub>O (3:1, 12 mL) was allowed to heat to reflux overnight under nitrogen protection. The mixture was cooled to ambient temperature after the reaction. And the formed solid was collected by filtration, washed with deionized H<sub>2</sub>O (2 × 50 mL) and diethyl ether (2 × 30 mL) and dried to afford the corresponding dimer compounds.

##### Preparation of the final cyclometallated iridium(III) compounds

A suspension of [(C<sup>^</sup>N)<sub>2</sub>Ir(μ-Cl)]<sub>2</sub> (0.2 mmol) and corresponding N<sup>^</sup>N ligands (0.24 mmol, 2.2 eq.) in DCM:MeOH (1:1, 16 mL) was heated to reflux for 6 h. The resulting solution was cooled to ambient temperature, and filtered to remove unreacted cyclometallated dimer. Afterwards an aqueous solution of ammonium hexafluorophosphate was added to the filtrate, and the solvent was removed in vacuum until the solid occurred. The precipitate was collected and washed with deionized H<sub>2</sub>O (2 × 50 mL) followed by diethyl ether (2 × 30 mL). The mixture was purified by silica gel column dichloromethane as the eluent to afford the titled compounds.

## Stability analysis

**1** was stored in  $[d_6]$ DMSO/ $D_2O$  (v/v = 9:1) at 298K for seven days, and was determined by  $^1H$  NMR spectroscopy.  $^1H$  NMR experiments were carried out on a 400 MHz ( $^1H$ ) Bruker instrument. Additionally, **1** was also stored in acetonitrile/Tris-HCl buffer (v/v = 8:2, 20  $\mu$ M) 298K for seven days. Absorption spectra were recorded on Cary UV-100 Spectrophotometer.

## Photophysical measurement

The photophysical properties including UV absorbance, emission spectra and lifetime of iridium(III)-cyclometallated compounds were performed on a PTI TimeMaster C720 Spectrometer (Nitrogen laser: pulse output 337 nm) based on the reported methods [1].

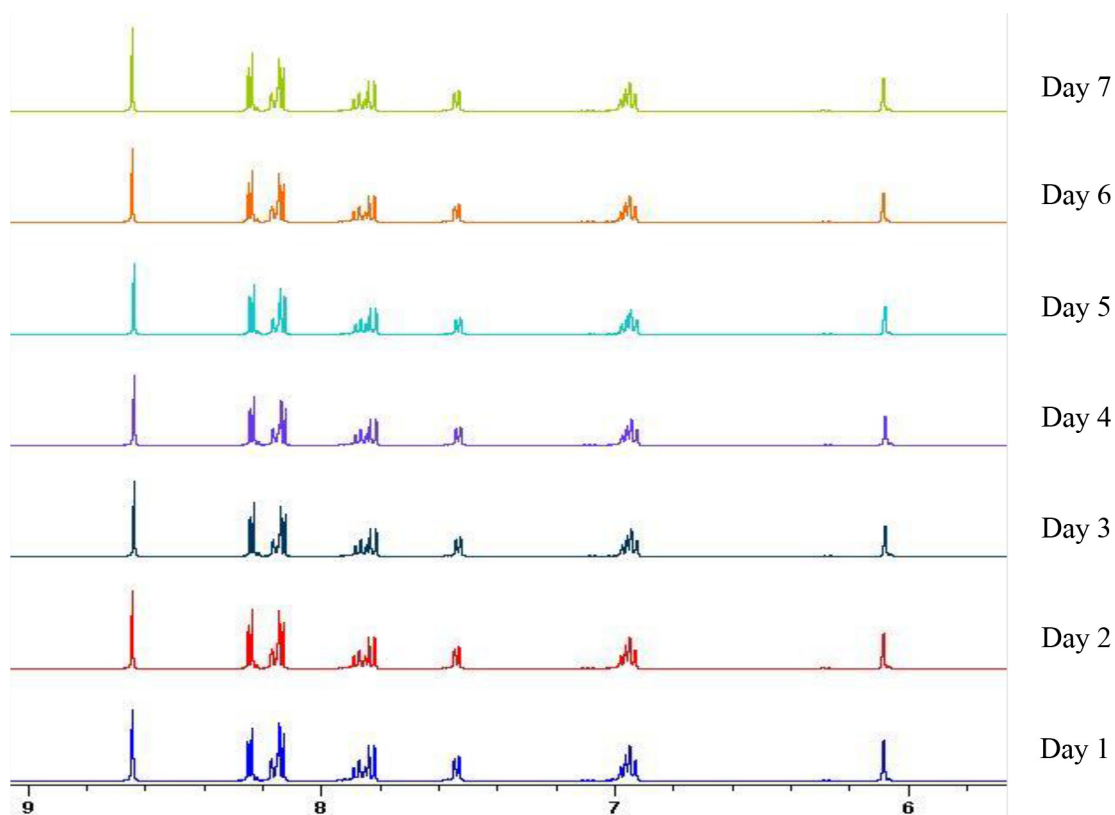

Supplementary Figure S1: Aromatic region of the  $^1H$  NMR spectra of **1** at a concentration of 5 mM in 90%  $[d_6]$  DMSO/10%  $D_2O$  at 298 K over 7 days.

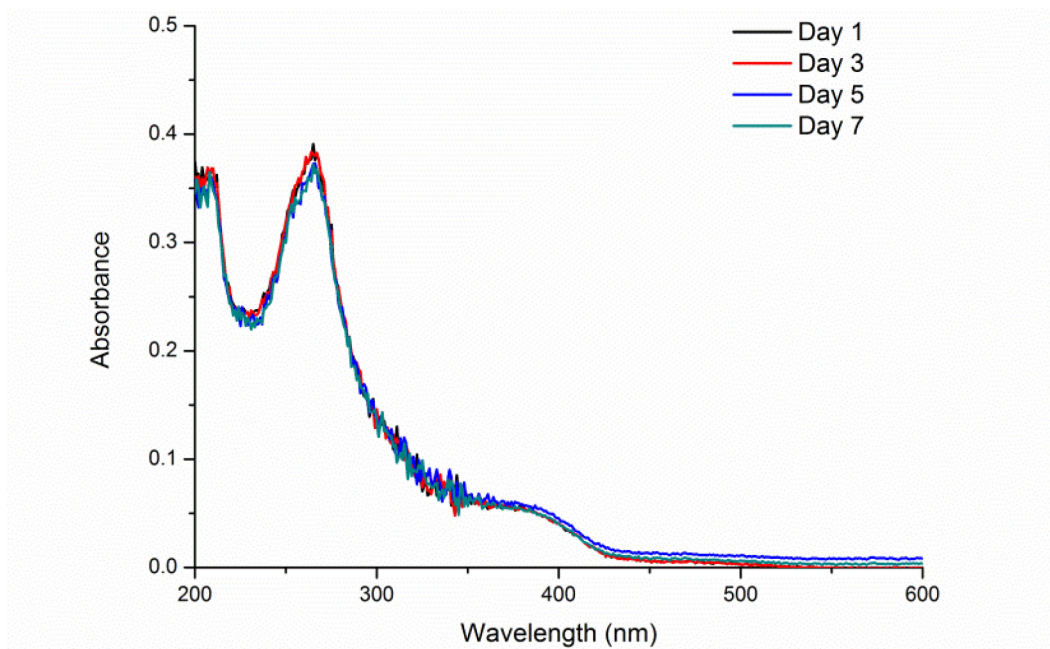

Supplementary Figure S2: UV/Vis absorption of 1 at a concentration of 20  $\mu\text{M}$  in 80% acetonitrile/20% 20 mM Tris-HCl buffer (containing 20 mM NaCl, pH 7.5) at 298 K over 7 days.

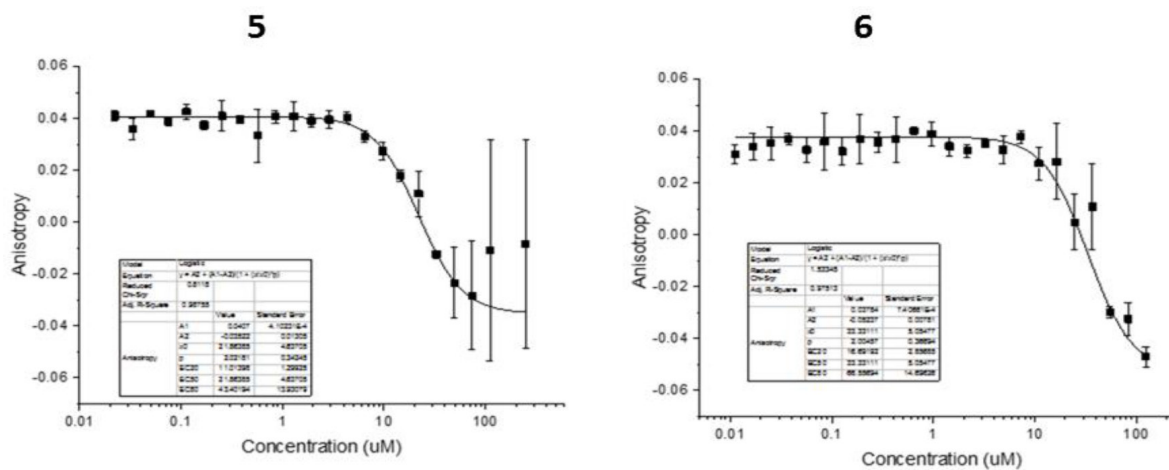

Supplementary Figure S3: FA titration data of 5 and 6. 5 and 6 was incubated together with 150 nM *hDM2*<sub>17-126</sub> recombinant fragment and 50 nM fluorescein-labelled p53 peptide (p53<sub>15-31Flu</sub>), the fluorescence anisotropy was measured at 480ex/535em.

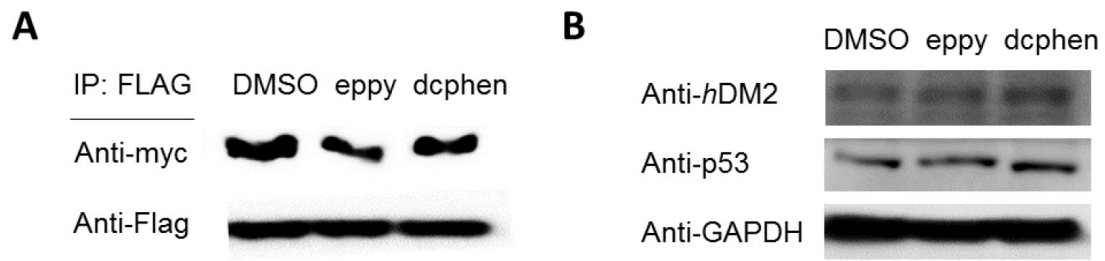

**Supplementary Figure S4:** (A) Ligand eppy and dcphen have no effect on the interaction of p53/*hDM2* in A375 cells. (B) Ligand eppy and dcphen have no effect on the protein expression levels of p53 and *hDM2* in A375 cells.

HKBU\_PROTON

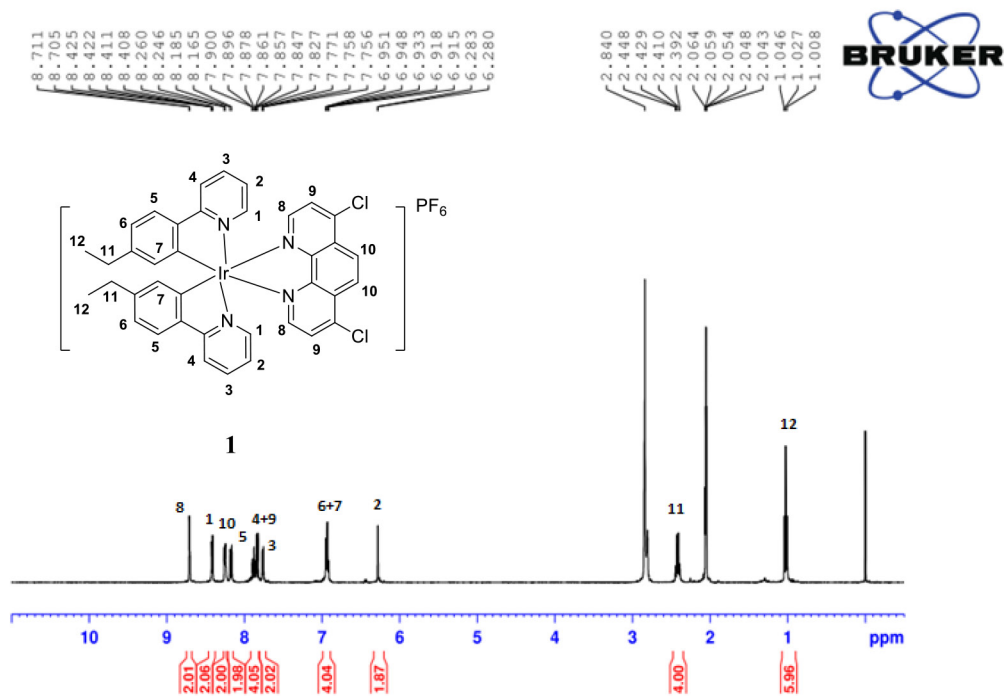

HKBU\_CARBON

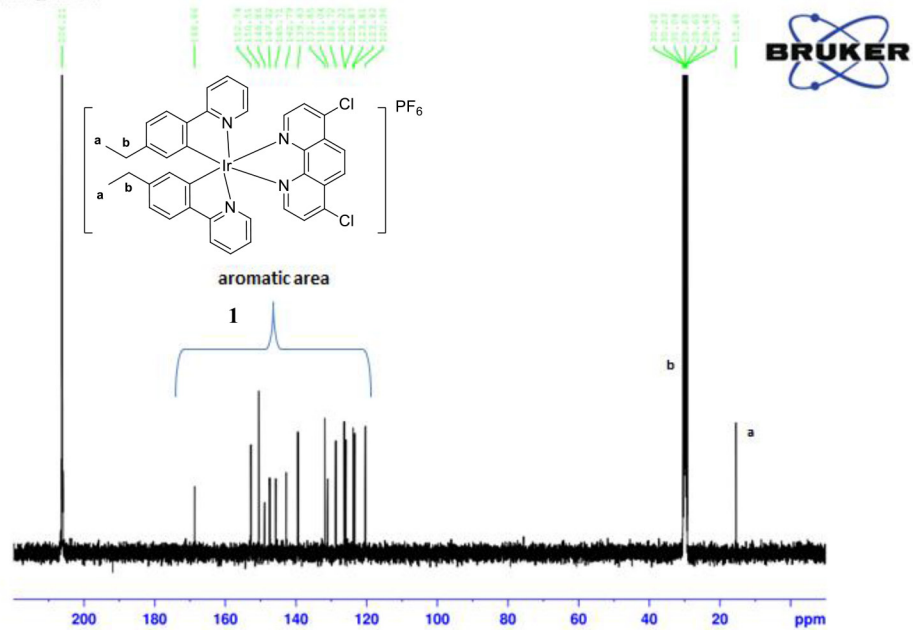

Supplementary Figure S5: NMR signal assignment of **1**.

HKBU\_PROTON

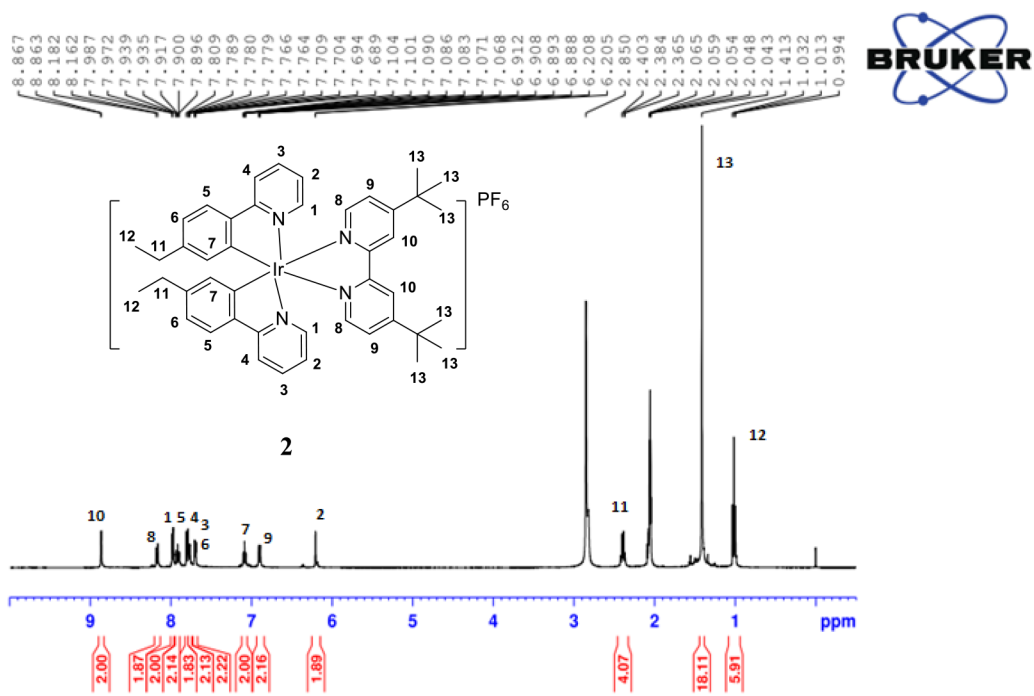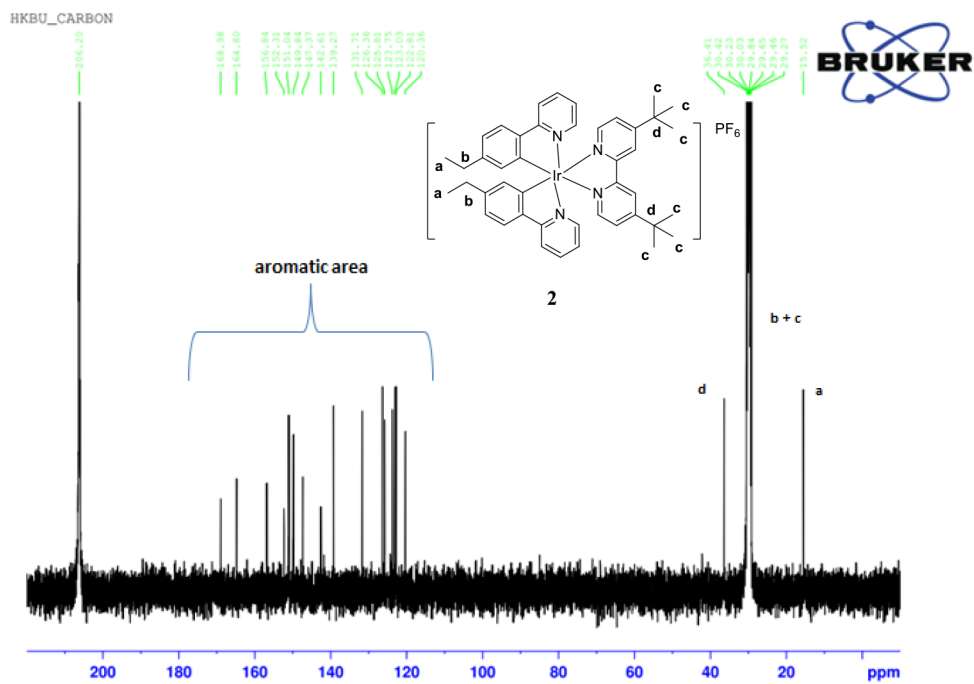

Supplementary Figure S6: NMR signal assignment of 2.



HKBU\_PROTON

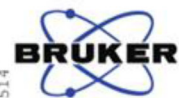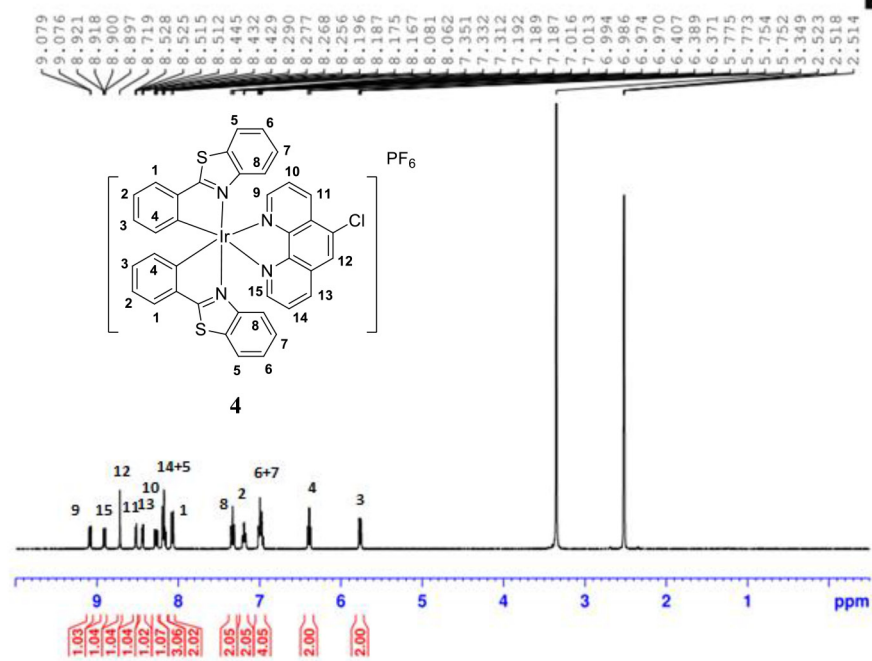

HKBU\_CARBON

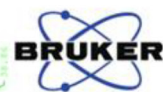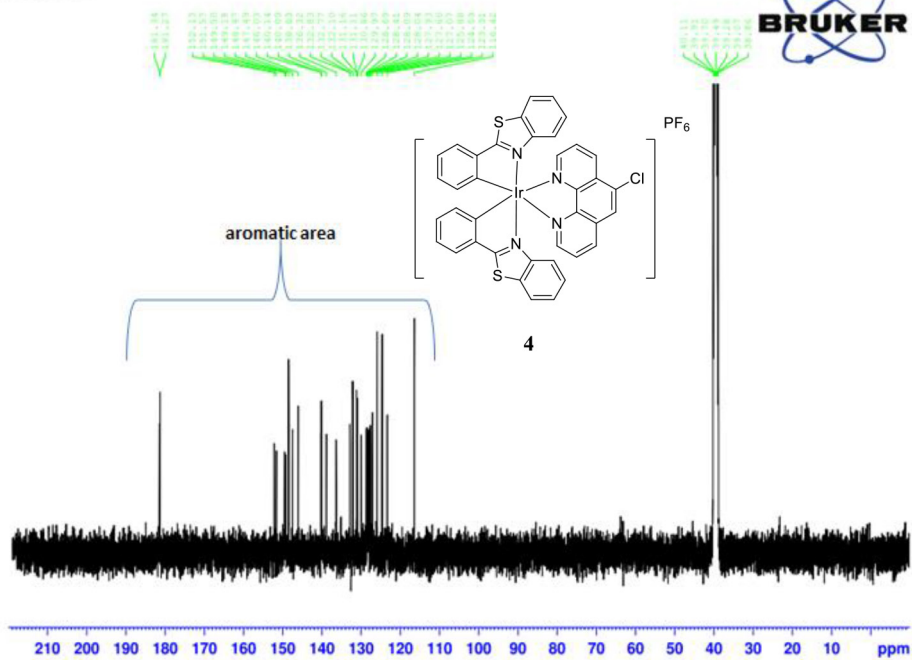

Supplementary Figure S7: NMR signal assignment of 4.





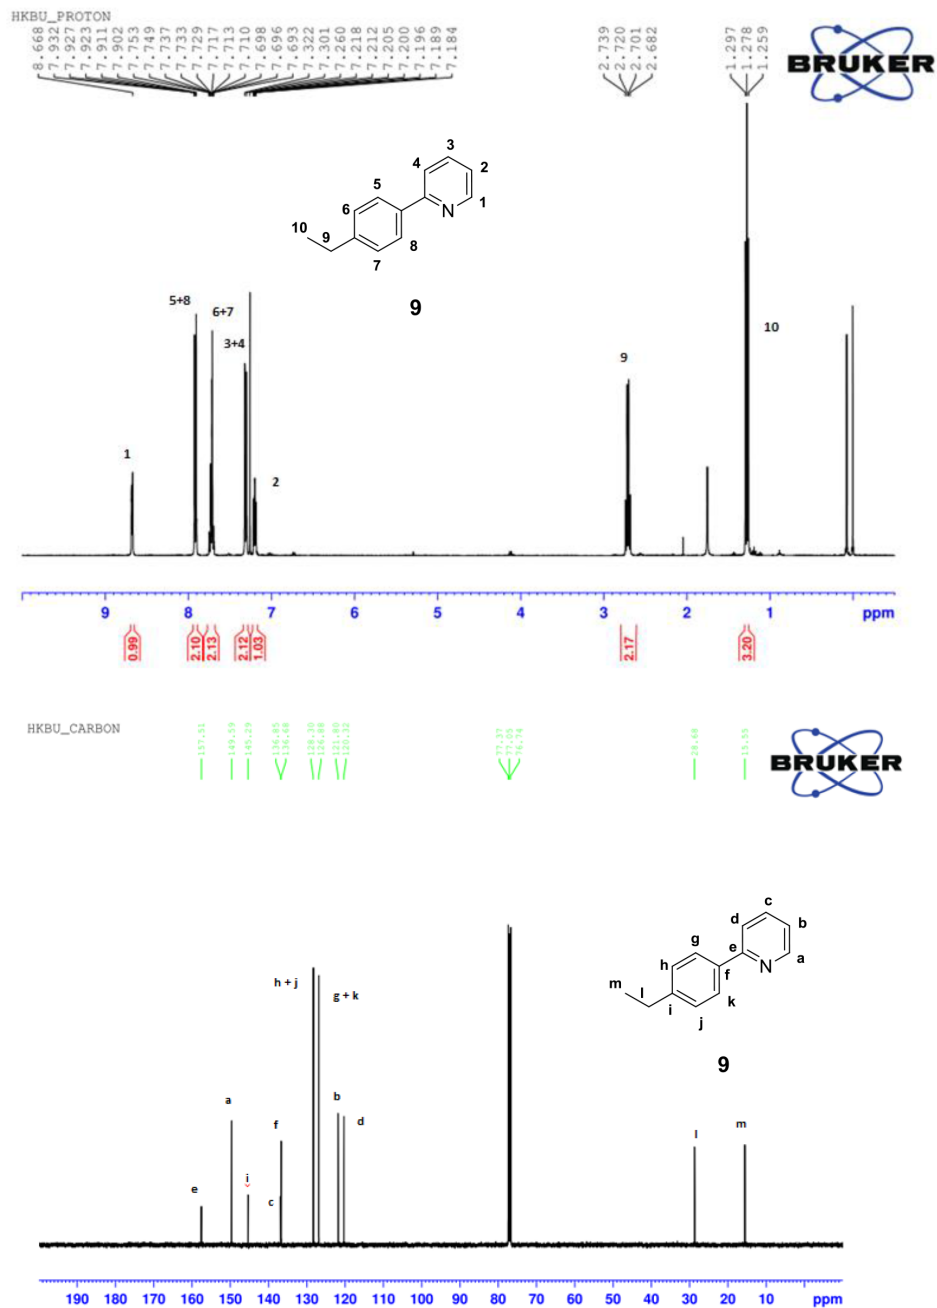

Supplementary Figure S9: NMR signal assignment of 9.

**Supplementary Table S1: Photophysical properties of cyclometallated iridium(III) compounds 1–6**

| Cyclometallated iridium(III) compounds | Quantum yield | $\lambda_{em}/nm$ | Lifetime/ $\mu s$                | UV/vis absorption $\lambda_{abs}/nm$ ( $\epsilon/dm^3 \cdot mol^{-1} \cdot cm^{-1}$ )                           |
|----------------------------------------|---------------|-------------------|----------------------------------|-----------------------------------------------------------------------------------------------------------------|
| 1                                      | 0.063         | 639               | $4.577 \pm 5.090 \times 10^{-3}$ | 267 ( $7.95 \times 10^3$ )                                                                                      |
| 2                                      | 0.181         | 585               | $4.508 \pm 5.638 \times 10^{-3}$ | 209 ( $8.20 \times 10^3$ ), 257 ( $1.15 \times 10^4$ ), 285 ( $1.43 \times 10^4$ ), 299 ( $6.35 \times 10^3$ )  |
| 3                                      | 0.275         | 574               | $4.399 \pm 3.394 \times 10^{-3}$ | 246 ( $1.07 \times 10^4$ )                                                                                      |
| 4                                      | 0.142         | 608               | $3.459 \pm 1.297 \times 10^{-2}$ | 203 ( $1.50 \times 10^4$ ), 229 ( $1.23 \times 10^4$ ), 270 ( $8.10 \times 10^3$ ),                             |
| 5                                      | 0.067         | 568               | $4.610 \pm 7.413 \times 10^{-3}$ | 262 ( $3.79 \times 10^4$ ), 279 ( $2.88 \times 10^4$ ), 334 ( $1.13 \times 10^4$ )                              |
| 6                                      | 0.010         | 554               | $3.856 \pm 6.450 \times 10^{-3}$ | 213 ( $1.03 \times 10^4$ ), 252 ( $1.11 \times 10^4$ ), 275 ( $1.65 \times 10^4$ ), 316 ( $5.10 \times 10^3$ ), |

**Supplementary Table S2: The toxicity of 1 on different human cancer cell lines as determined by an MTT assay**

| Cell lines               | p53 status | IC <sub>50</sub> values of 1 ( $\mu M$ ) |
|--------------------------|------------|------------------------------------------|
| Human malignant melanoma |            |                                          |
| A375                     | wt         | $0.6468 \pm 0.03541$                     |
| Human colon carcinoma    |            |                                          |
| A431                     | wt         | $0.4164 \pm 0.03742$                     |
| Human breast carcinoma   |            |                                          |
| MCF7                     | wt         | $0.5469 \pm 0.04096$                     |
| MD-MBA-231               | mut        | $0.8348 \pm 0.04286$                     |
| MD-MBA-468               | mut        | $1.888 \pm 0.02335$                      |
| T47D                     | mut        | $0.7832 \pm 0.4826$                      |
| Human lung carcinoma     |            |                                          |
| A549                     | wt         | $0.2320 \pm 0.02183$                     |
| H1299                    | null       | $2.204 \pm 0.03826$                      |
| Human ovarian carcinoma  |            |                                          |
| A2780                    | wt         | $0.4950 \pm 0.03202$                     |
| Human cervix carcinoma   |            |                                          |
| HeLa                     | wt         | $0.4799 \pm 0.04474$                     |

**REFERENCES**

1. Lin S, Gao W, Tian ZR, Yang C, Lu LH, Mergny JL, Leung CH, Ma DL. Luminescence switch-on detection of protein tyrosine kinase-7 using a G-quadruplex-selective probe. Chem Sci. 2015; 6:4284–4290.
